# Supplementary material for: Risk and timing of venous thromboembolism in patients with gastrointestinal cancer: a nationwide Danish cohort study
Source: HighWire-hosted journal article supplement (doi:10.1136/bmjopen-2022-062768), 2023-01-01
Supplement: bmjopen-2022-062768supp001_data_supplement.pdf [file bmjopen-2022-062768supp001_data_supplement.pdf]

## Supplementary

**Table S1:** List of ICD-10 diagnoses codes and ATC codes

| <b>Exposure</b>                                                           |                        |                                                                                                                                                  |
|---------------------------------------------------------------------------|------------------------|--------------------------------------------------------------------------------------------------------------------------------------------------|
| <i>Gastro intestinal cancers</i><br>(A+B+G diagnosis, patient type = 0+2) | Defined from diagnosis | ICD-10: DC15, DC16, DC17, DC18, DC19, DC20, DC21, DC22, DC23, DC24, DC25, DC26                                                                   |
| <b>Outcomes</b>                                                           |                        |                                                                                                                                                  |
| <b>Venous thromboembolism</b>                                             |                        |                                                                                                                                                  |
| <i>Pulmonary embolism</i>                                                 | Defined from diagnosis | ICD-10: DI26                                                                                                                                     |
| <i>Deep venous thrombosis</i>                                             | Defined from diagnosis | ICD-10: I801-I803, I808, I809, I821-I823, I828, I829                                                                                             |
| <b>Comorbidities</b>                                                      |                        |                                                                                                                                                  |
| <i>(A+B diagnoses, patient type= 0 and 2)</i>                             |                        |                                                                                                                                                  |
| <i>Ischemic heart disease</i>                                             | Defined from diagnosis | ICD-10: DI20-25                                                                                                                                  |
| <i>Acute myocardial infarction</i>                                        | Defined from diagnosis | ICD-10: DI21, DI22                                                                                                                               |
| <i>Atrial fibrillation</i>                                                | Defined from diagnosis | ICD-10: DI48                                                                                                                                     |
| <i>Other cancers</i>                                                      | Defined from diagnosis | ICD-10: DC                                                                                                                                       |
| <i>Chronic kidney disease</i>                                             | Defined from diagnosis | ICD-10: DE102, DE112, DE132, DE142, DI120, DN02, DN03, DNO4, DN05, DN06, DN07, DN08, DN11, DN12, DN14, DN158, DN159, DN160, DN162, DNI63, DN164, |

|                                              |                                                                                                                                                                                                                                                    |                                                                                                                                                                                                                                                 |
|----------------------------------------------|----------------------------------------------------------------------------------------------------------------------------------------------------------------------------------------------------------------------------------------------------|-------------------------------------------------------------------------------------------------------------------------------------------------------------------------------------------------------------------------------------------------|
|                                              |                                                                                                                                                                                                                                                    | DN168, DN18, DN19, DN26, DQ61, DM300, DM313, DM319, DM321B                                                                                                                                                                                      |
| <i>Hypertension</i>                          | <i>Defined from combination treatment with at least two classes of antihypertensive drugs: adrenergic <math>\alpha</math>-antagonists, non-loop diuretics, vasodilators, beta-blockers, calcium channel blockers and renin-angiotension system</i> | <i>ATC: C02A, C02B, C02C, C02L, C03A, C03B, C03D, C03E, C03X, C07B, C07C, C07D, C08G, C02DA, C09BA, C09DA, C02DB, C02DD, C02DG, C07A, C07B, C07C, C07D, C07F, C08, C09BB, C09DB, C09AA, C09BA, C09BB, C09CA, C09DA, C09DB, C09XA02, C09XA52</i> |
| <i>Chronic obstructive pulmonary disease</i> | <i>Defined from diagnosis</i>                                                                                                                                                                                                                      | ICD-10: DJ42, DJ43, DJ44                                                                                                                                                                                                                        |
| <i>Chronic heart failure</i>                 | <i>Defined from diagnosis</i>                                                                                                                                                                                                                      | ICD-10: DI110, DI42, DI50, DJ81                                                                                                                                                                                                                 |
| Diabetes mellitus                            | Diabetes mellitus Defined from glucose lowering drugs                                                                                                                                                                                              | ATC: A10                                                                                                                                                                                                                                        |

**Table S2:** list of ATC-codes

|                              |                                                                      |                                                                                           |
|------------------------------|----------------------------------------------------------------------|-------------------------------------------------------------------------------------------|
| <i>ADP-receptor blockers</i> | Defined from ATC-codes                                               | B01AC04, B01AC24, B01AC22                                                                 |
| <i>Aspirin</i>               | Defined from treatment with acetylsalicylic acid                     | B01AC06, N02BA01                                                                          |
| <i>Acid pump inhibitors</i>  | Defined from ATC-codes                                               | A02BC                                                                                     |
| <i>Birth control</i>         | Defined from treatment with hormonal contraceptives for systemic use | G03A                                                                                      |
| <i>Loop diuretics</i>        | Defined from ATC-codes                                               | C03CA01, C03EB, C03CA02                                                                   |
| <i>Non-loop diuretics</i>    | Defined from ATC-codes                                               | C02DA, C02L, C07D, C09XA52, C03A, C03EA, C03B, C03X, C07C, C08G, C09BA, C09DA, C03D, C03E |
| <i>Beta- blockers</i>        | Defined from ATC-codes                                               | C07A, C07B, C07C, C07D, C07F                                                              |

---

---

|                                            |                        |                                                            |
|--------------------------------------------|------------------------|------------------------------------------------------------|
| <i>Calcium channel antagonists</i>         | Defined from ATC-codes | C08, C09BB, C09DB                                          |
| <i>Renin angiotensin system inhibitors</i> | Defined from ATC-codes | C09AA, C09BA, C09BB, C09CA, C09DA, C09DB, C09XA02, C09XA52 |
| <i>Oral steroids</i>                       | Defined from ATC-codes | H02AB06, H02AB07                                           |
| <i>Anti psychotics</i>                     | Defined from ATC-codes | N05A                                                       |
| <i>Dipyridamol</i>                         | Defined from ATC-codes | B01AC07                                                    |
| <i>OAC</i>                                 | Defined from ATC-codes | B01AA03, B01AA04, B01AE07, B01AF01, B01AF02, B01AF03       |

---
